# Supplementary material for: A general precipitation strategy for large-scale synthesis of molybdate nanostructures
Source: Royal Society of Chemistry journal article supplement (doi:10.1039/b812033a), 2008-01-01
Supplement: b812033a.pdf [file b812033a.pdf]

## Supporting Information

### **A General Precipitation Strategy for Large-scale Synthesis of Molybdates Nanostructures**

Cheng Peng, Lian Gao<sup>\*</sup>, Songwang Yang and Jing Sun

*State Key Laboratory of High Performance Ceramics and Superfine Microstructure, Shanghai  
Institute of Ceramics, Chinese Academy of Sciences, 1295 Dingxi Road, Shanghai 200050, P.  
R. China*

## 1. Characterization

The samples were characterized by XRD (Model D/MAX-RB, Rigaku Co., Tokyo, Japan; CuK $\alpha$ , 10-70 $\circ$ ), TEM, SAED (Model JEM-2100F, JEOL, Tokyo, Japan), SEM (JSM-6700F, JEOL, Tokyo, Japan) and TG-DTA (STA-449C, Netzsch, Bayern, Germany)

## 2. SEM image of ZnMoO $_4$ · $n$ H $_2$ O

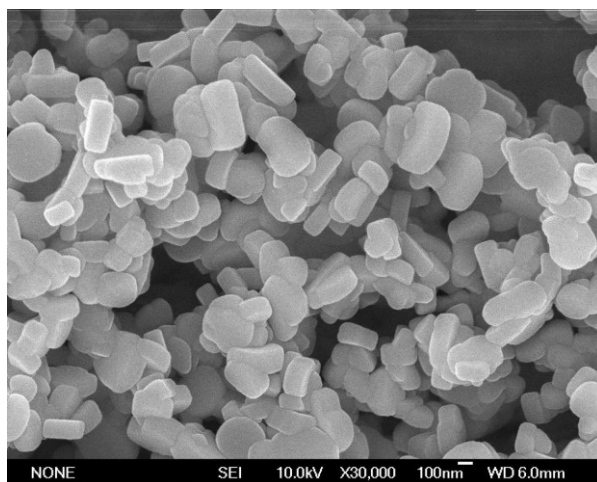

Figure S1. SEM image of ZnMoO $_4$ · $n$ H $_2$ O

### 3. Thermal behavior of $\text{ZnMoO}_4 \cdot n\text{H}_2\text{O}$

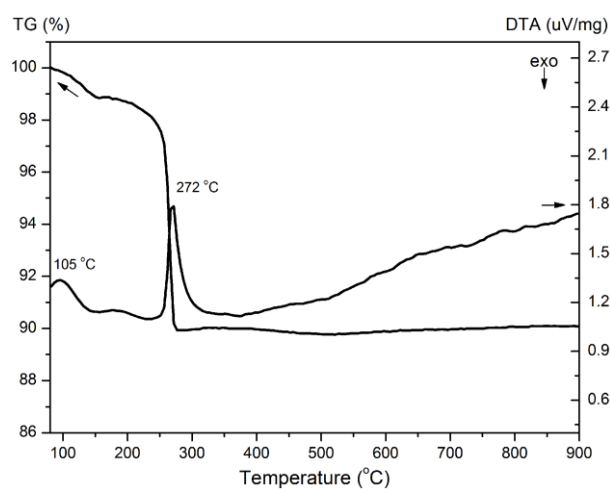

Figure S2. TG-DTA plot of  $\text{ZnMoO}_4 \cdot n\text{H}_2\text{O}$

### 4. TEM image and SAED pattern of $\text{ZnMoO}_4$

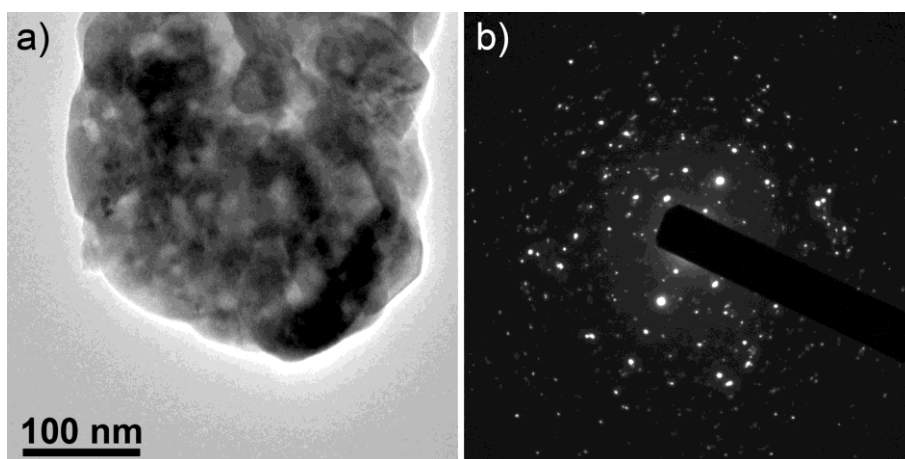

Figure S3. a) TEM image and b) SAED pattern of  $\text{ZnMoO}_4$

## 5. TEM images of $\text{MnMoO}_4 \cdot n\text{H}_2\text{O}$ and $\text{MnMoO}_4$

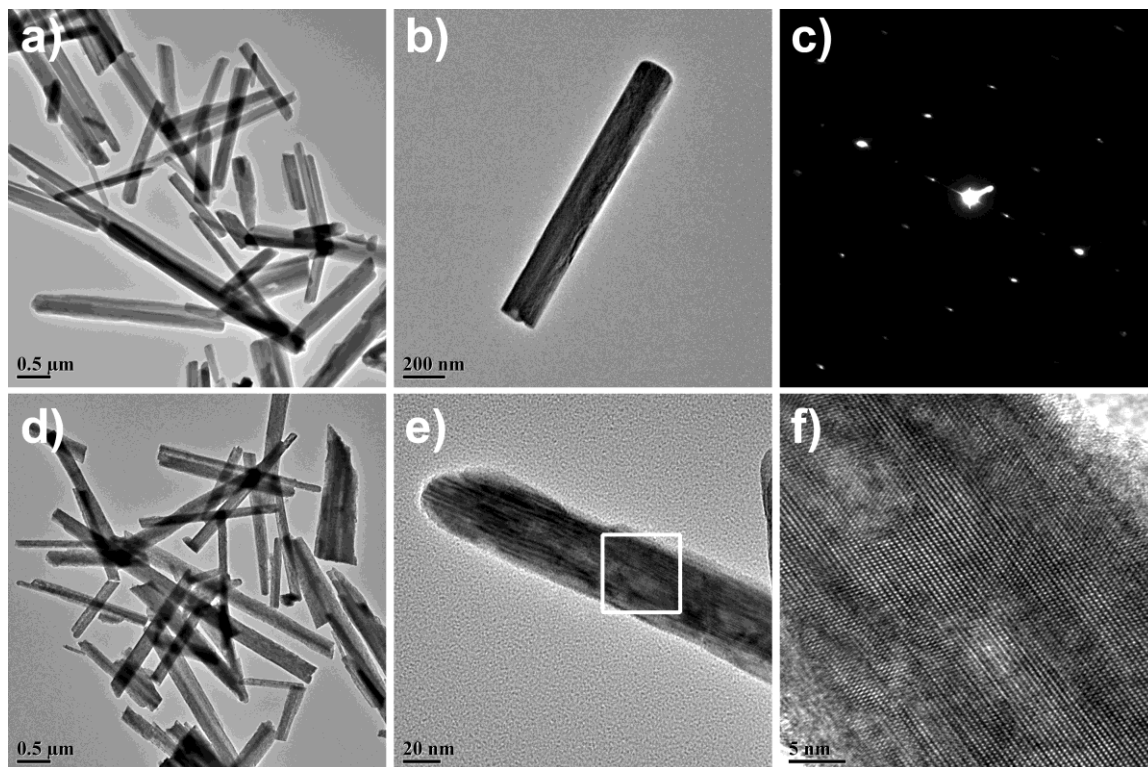

Figure S4. a) TEM image, b) enlarged image, c) SAED pattern of  $\text{MnMoO}_4 \cdot n\text{H}_2\text{O}$ , d) TEM image, e) enlarged image, f) HRTEM image of  $\text{MnMoO}_4$  from the dehydration of  $\text{MnMoO}_4 \cdot n\text{H}_2\text{O}$

## 6. TEM images of $\text{CoMoO}_4$

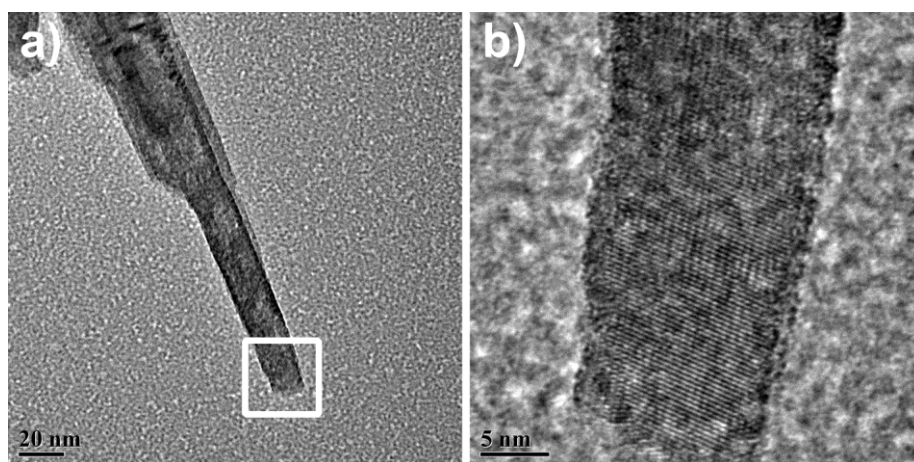

Figure S5. a) TEM image and b) HRTEM image of  $\text{CoMoO}_4$
